# Supplementary material for: High density, addressable electrohydrodynamic printhead made of a silicon plate and polymer nozzle structure
Source: Royal Society of Chemistry journal article supplement (doi:10.1039/d2lc00624c), 2022-01-01
Supplement: d2lc00624c1.pdf [file d2lc00624c1.pdf]

## Supplementary materials

### High density, addressable electrohydrodynamic printhead made of silicon plate and polymer nozzle structure

Yongqing Duan,<sup>\*a,b</sup> Weili Yang,<sup>a</sup> Jingjing Xiao,<sup>a</sup> Jixin Gao,<sup>a</sup> Lai Wei,<sup>a</sup> YongAn Huang,<sup>a,b</sup> Zhouping Yin,<sup>\*a,b</sup>

a. State Key Laboratory of Digital Manufacturing Equipment and Technology, Huazhong University of Science and Technology, Wuhan 430074, P. R. China.

b. Flexible Electronics Research Center, Huazhong University of Science and Technology, Wuhan 430074, China.

\* Corresponding author: duanyongqing@hust.edu.cn, yinzhp@mail.hust.edu.cn

## Supplementary Data

### 1. Simulation model and setup

The fluid motion in the electric field is governed by the Navier–Stokes equations:

$$\nabla \cdot v = 0 \quad (1)$$

$$\rho \frac{\partial v}{\partial t} + \rho v \cdot \nabla v = -\nabla p + \mu \nabla^2 v + f_e + \gamma \kappa \nabla c \quad (2)$$

where  $\rho$ ,  $v$ ,  $p$ ,  $\mu$  and  $\gamma$  are the density, velocity, pressure, viscosity, and surface tension coefficient of fluids, respectively.  $f_e$  is the volumetric electric force acting on fluid.  $\kappa$  is the curvature (surface tension only exists at the interface between solution and air), which can be calculated by the volume fraction  $c$  in Level-Set (LS) method as follows:

$$\kappa = \nabla \cdot \left( \frac{\nabla c}{|\nabla c|} \right) \quad (3)$$

In the LS method,  $f_e$  can be derived from the electrostatic Maxwell stress tensor:

$$f_e = q\mathbf{E} - \frac{1}{2}|E|^2 \nabla \varepsilon \quad (4)$$

where  $E = -\nabla U$  is the electric field and  $U$  is the electric potential. The electric potential  $U$  is calculated by Laplace's equation:

$$\nabla^2 U = 0 \quad (5)$$

Besides, the conservation of charge used here is:

$$\frac{\partial q}{\partial t} + \nabla \cdot (\sigma E + qv) = 0 \quad (6)$$

where  $q$  is the charge density.

The governing equations (1-6) are solved by the finite element method via COMSOL software.

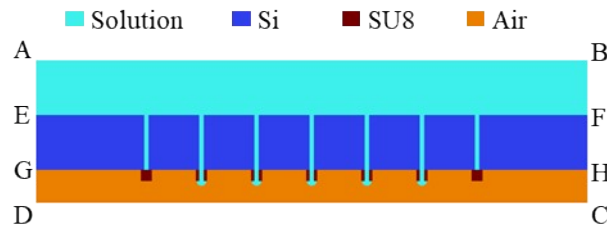

**Figure S1.** The schematic diagram of the calculation domain.

Figure S1 shows the calculation domain and different colors represent different materials. Table S1 gives the concrete boundary conditions, and Table S2 lists some parameters of materials used in simulations.

**Table S1.** Boundary conditions

| Boundary | Type         | Electrostatic boundary condition | Hydrodynamic boundary condition |
|----------|--------------|----------------------------------|---------------------------------|
| AB       | Inlet        | $U = U_{on}$                     | $u = 0, v = v_0$                |
| AE, BF   | Wall         | /                                | $v = 0$                         |
| CD       | Ground(wall) | $U = 0$                          | $v = 0$                         |
| DG, CH   | Outlet       | /                                | $p = 0$                         |

**Table S2.** Material parameters used in simulations

| Material   | Conductivity   | Relative dielectric constant |
|------------|----------------|------------------------------|
| SU8 nozzle | $10^{-13}$ S/m | 3.7                          |
| Air        | $10^{-14}$ S/m | 1                            |
| Si         | 10 S/m         | 11.7                         |

In addition, the current computer is difficult to support the three-dimensional arrayed EHD jet printing simulation, so we use a two-dimensional model to implement the simulation when the jets of nozzles are concerned, and a three-dimensional model to implement the simulation for accuracy when only electric field is solved.

## 2. Supplementary pictures

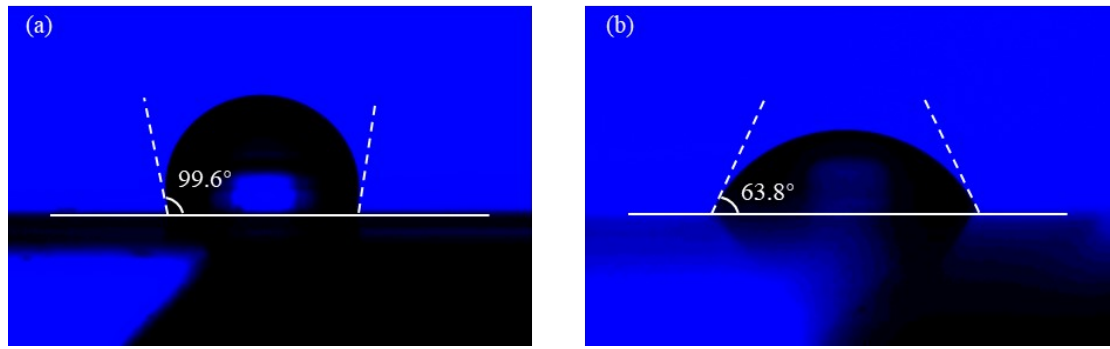

**Figure S2.** Contact angle of water on (a) a SU8 substrate and (b) a silicon substrate.

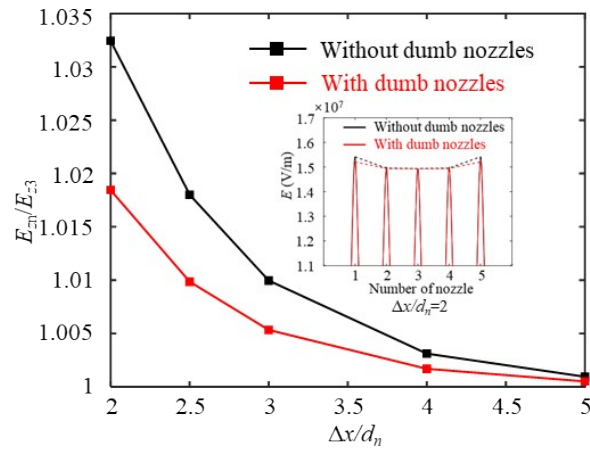

**Figure S3.** The effect of the dumb nozzles on the uniformity of the electric field at the tip of the nozzles.

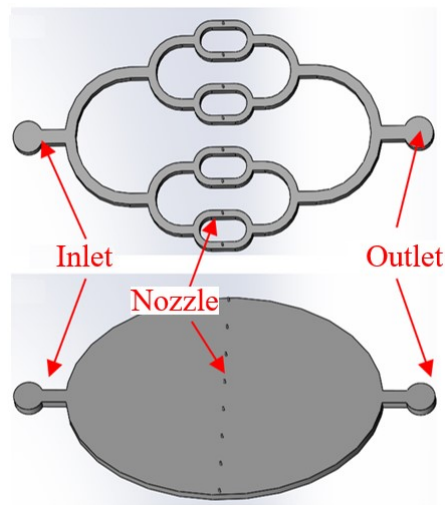

**Figure S4.** The microchannel structure of the printhead chip (back view in Figure 3b in the manuscript).

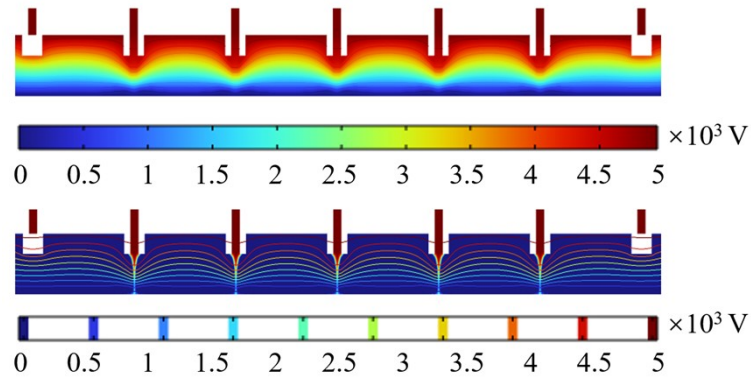

**Figure S5.** The simulation picture of the multi-nozzle EHD printhead with 100  $\mu\text{m}$  nozzle diameter and 500  $\mu\text{m}$  nozzle spacing, which demonstrates that no obvious crosstalk exists.

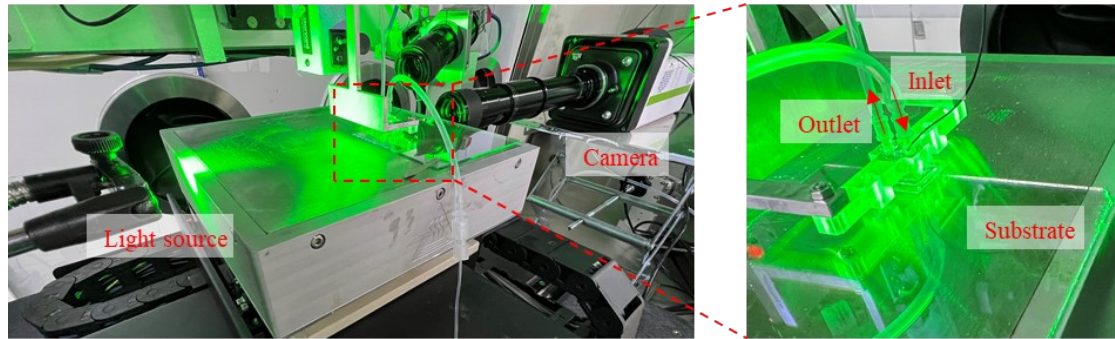

**Figure S6.** The picture of the experimental platform and the printhead.

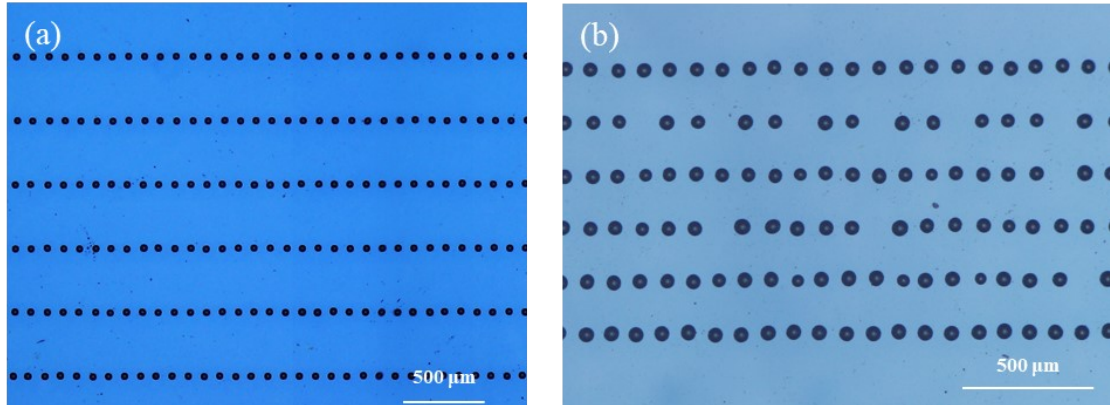

**Figure S7.** (a) The droplets printed by an EHD printhead with  $\Delta x/d_n = 5$  (the nozzle spacing and diameter are 400  $\mu\text{m}$  and 80  $\mu\text{m}$ ) and (b)  $\Delta x/d_n = 2.5$  (the nozzle spacing and diameter are 200  $\mu\text{m}$  and 80  $\mu\text{m}$ ).

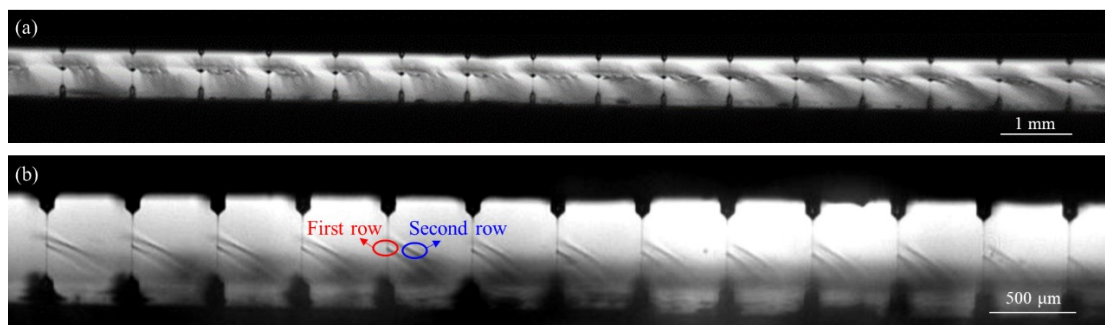

**Figure S8.** (a) The jetting image of an EHD printhead with 24 nozzles, the nozzle spacing is 1mm (limited by the field of vision, only 16 nozzles were photographed). (b) The jetting image of an EHD printhead with a two-row nozzle array, the nozzle spacing is 500  $\mu\text{m}$  (due to the focal length of the camera, only one row of nozzles is photographed). The red and blue ellipses in the figure represent the droplets printed by the first and the second row of nozzles, respectively).

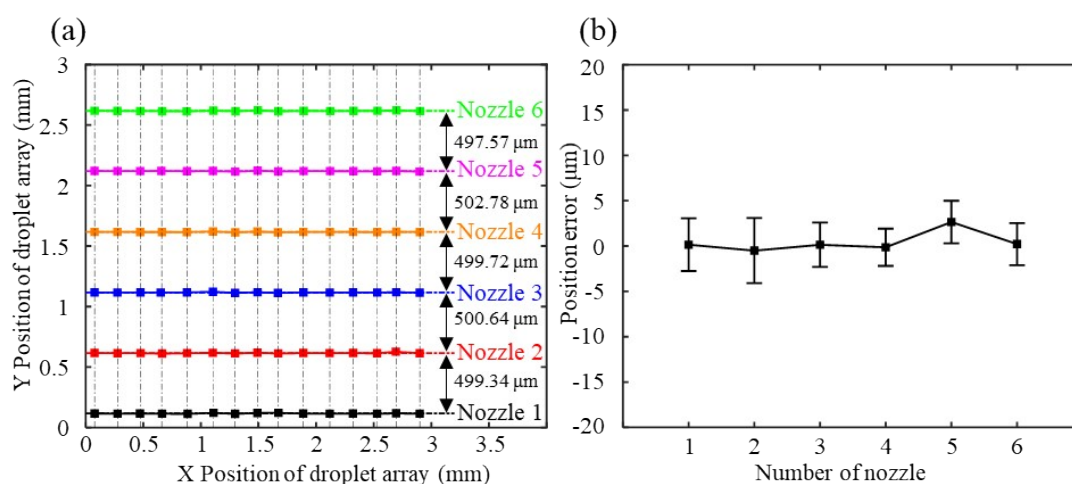

**Figure S9.** (a) Position analysis diagram of droplets in Fig. 4d in the manuscript. (b) Position error analysis of droplet array in Y direction. Take the middle position of nozzles 3 and 4 as the coordinate origin.

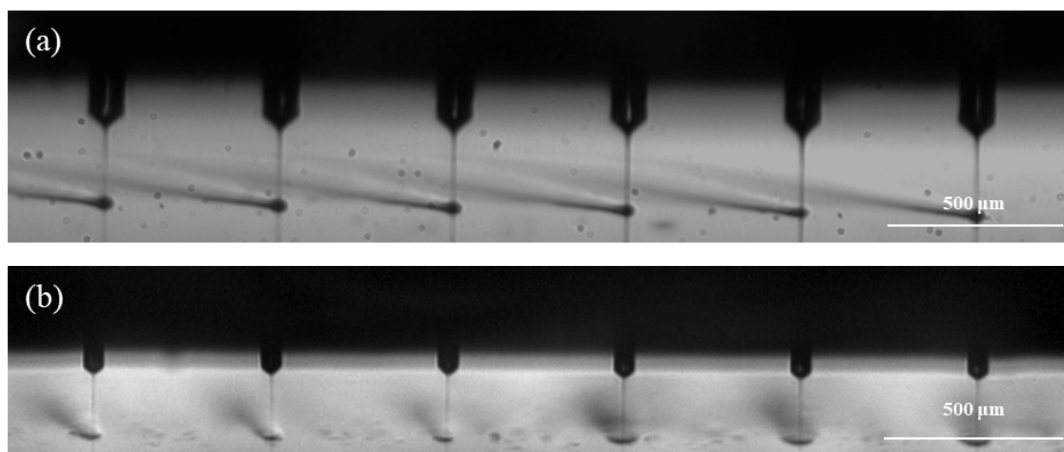

**Figure S10.** The same printhead is capable of printing with different inks. (a) The solution is triethylene glycol; (b) The solution is ethanol.

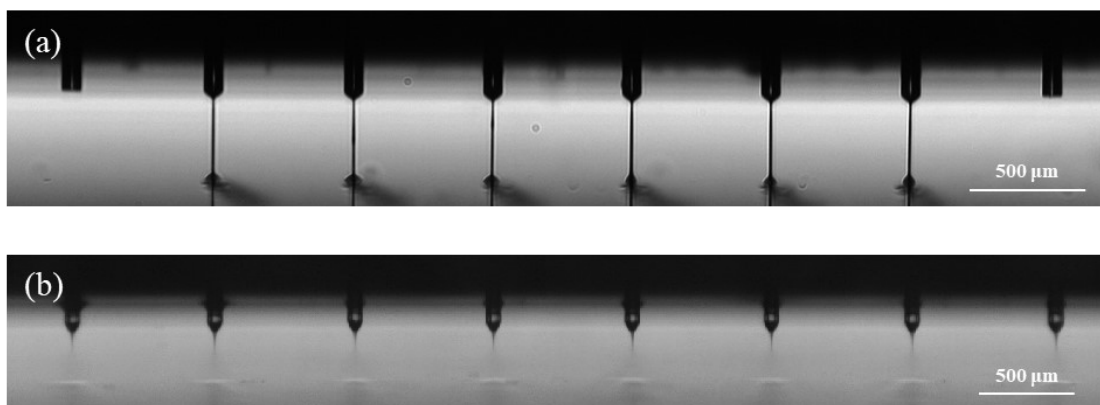

**Figure S11.** The jetting image of an EHD printhead with different solutions. (a) The solution is DMSO with polymer PVP dissolved (the concentration of PVP is 500mg/g). The printing height is 350  $\mu\text{m}$ , the rectangular pulsed voltage is  $1600 \pm 200$  V, 50 Hz, 5%; (b) The solution is silver ink containing silver nanoparticles. As the ink used is with high conductivity and low viscosity, the jetting mode is electrospray. The printing height is 300  $\mu\text{m}$ , the rectangular pulsed voltage is  $1100 \pm 200$  V, 50 Hz, 10%.

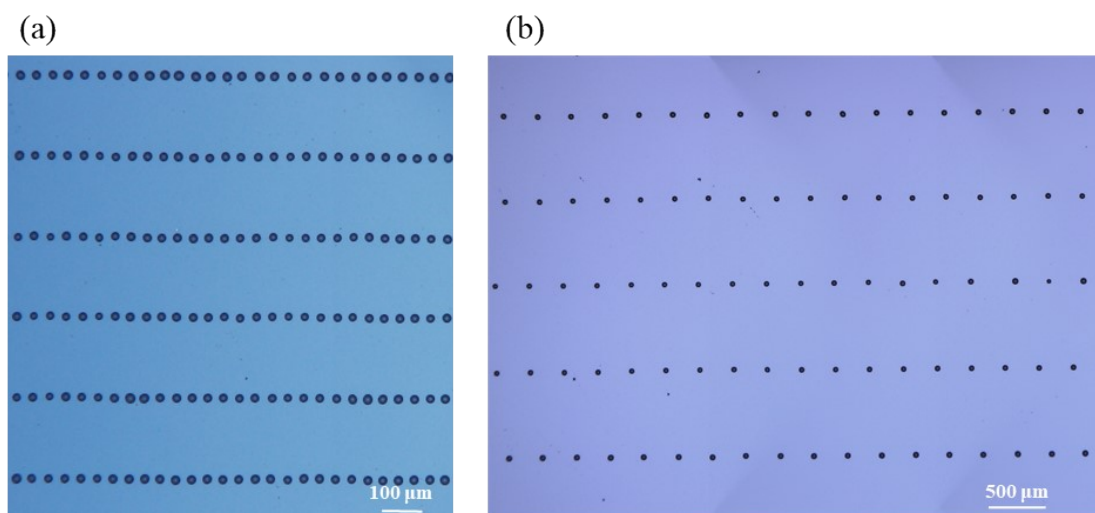

**Figure S12.** (a) Small size droplets ( $< 20$   $\mu\text{m}$ ) printed with triethylene glycol. The printing height is 250  $\mu\text{m}$ , the rectangular pulsed voltage is  $1600 \pm 300$  V, 1000 Hz, 20%; (b) The printed droplets of glycerol. The printing height is 250  $\mu\text{m}$ , the rectangular pulsed voltage is  $1400 \pm 200$  V, 50 Hz, 8%.

### 3. Supplementary videos

1) Video S1: the printing height is 300  $\mu\text{m}$ , the rectangular pulsed voltage is  $1000 \pm 500$  V, the injection frequency is 100 Hz, and the duty cycle is 50%. The spacing of nozzles is 500  $\mu\text{m}$ . The solution used in the video is triethylene glycol. The video was shot at 5000 fps.

2) Video S2: the printing height is 250  $\mu\text{m}$ , the rectangular pulsed voltage is  $1500 \pm 350$  V, the injection frequency is 2500 Hz, and the duty cycle is 40%. The spacing of nozzles is 500  $\mu\text{m}$ . The solution used in the video is triethylene glycol. The video was shot at 15000 fps. The video playback rate is 4 fps.

3) Video S3: the printing height is 250  $\mu\text{m}$ , the rectangular pulsed voltage is  $1500 \pm 350$  V, the injection frequency is 2500 Hz, and the duty cycle is 40%. The spacing of nozzles is 500  $\mu\text{m}$ . The solution used in the video is triethylene glycol. The video was shot at 15000 fps. The video playback rate is 100 fps.

4) Video S4: the printing height is 320  $\mu\text{m}$ , the rectangular pulsed voltage is  $1400 \pm 400$  V, the injection frequency is 10000 Hz, and the duty cycle is 60%. The spacing of nozzles is 500  $\mu\text{m}$ . The solution used in the video is ethanol. The video was shot at 40000 fps.
